# Supplementary material
Source: publisher figshare collection journal article supplement (https://springernature.figshare.com/ndownloader/files/15569294)
Supplement: Supplementary file 1 [file 15569294]

## Sheet: Additional file 3
Sample	total_reads	total_mapped(%)	non_unique(%)	unique(%)	un_mapped_reads(%)	read1(%)	read2(%)	reads_map_plus(%)	reads_map_minus(%)	non_splice_reads(%)	splice_reads(%)
CK_EG_12_rep1	39212766	36695987(93.58)	862580(2.35)	35833407(97.65)	2516779(6.42)	17924805(50.02)	17908602(49.98)	17917314(50.00)	17916093(50.00)	26018861(72.61)	9814546(27.39)
CK_EG_12_rep2	40244914	38693093(96.14)	747539(1.93)	37945554(98.07)	1551821(3.86)	18983324(50.03)	18962230(49.97)	18973433(50.00)	18972121(50.00)	28003666(73.80)	9941888(26.20)
CK_EG_12_rep3	42320266	40692239(96.15)	1027193(2.52)	39665046(97.48)	1628027(3.85)	19841746(50.02)	19823300(49.98)	19833287(50.00)	19831759(50.00)	29198866(73.61)	10466180(26.39)
CK_EG_16_rep1	44124358	41997125(95.18)	1156095(2.75)	40841030(97.25)	2127233(4.82)	20429909(50.02)	20411121(49.98)	20420552(50.00)	20420478(50.00)	29857743(73.11)	10983287(26.89)
CK_EG_16_rep2	56362652	54341081(96.41)	1603016(2.95)	52738065(97.05)	2021571(3.59)	26381561(50.02)	26356504(49.98)	26369287(50.00)	26368778(50.00)	39225518(74.38)	13512547(25.62)
CK_EG_16_rep3	46727526	44050699(94.27)	932590(2.12)	43118109(97.88)	2676827(5.73)	21568518(50.02)	21549591(49.98)	21559189(50.00)	21558920(50.00)	31617759(73.33)	11500350(26.67)
CK_EG_20_rep1	37818620	35941204(95.04)	885477(2.46)	35055727(97.54)	1877416(4.96)	17534211(50.02)	17521516(49.98)	17527516(50.00)	17528211(50.00)	25068130(71.51)	9987597(28.49)
CK_EG_20_rep2	45680934	42716193(93.51)	1092662(2.56)	41623531(97.44)	2964741(6.49)	20822480(50.03)	20801051(49.97)	20811733(50.00)	20811798(50.00)	29888691(71.81)	11734840(28.19)
CK_EG_20_rep3	35749234	33852197(94.69)	992844(2.93)	32859353(97.07)	1897037(5.31)	16434279(50.01)	16425074(49.99)	16429771(50.00)	16429582(50.00)	23567933(71.72)	9291420(28.28)
CK_EG_24_rep1	47349176	45760933(96.65)	1277889(2.79)	44483044(97.21)	1588243(3.35)	22257361(50.04)	22225683(49.96)	22241650(50.00)	22241394(50.00)	32600473(73.29)	11882571(26.71)
CK_EG_24_rep2	39889744	38518644(96.56)	824195(2.14)	37694449(97.86)	1371100(3.44)	18863654(50.04)	18830795(49.96)	18847513(50.00)	18846936(50.00)	27514242(72.99)	10180207(27.01)
CK_EG_24_rep3	35467416	33927293(95.66)	852546(2.51)	33074747(97.49)	1540123(4.34)	16549817(50.04)	16524930(49.96)	16537372(50.00)	16537375(50.00)	24120678(72.93)	8954069(27.07)
CK_EG_32_rep1	36138246	34462337(95.36)	820622(2.38)	33641715(97.62)	1675909(4.64)	16833928(50.04)	16807787(49.96)	16821209(50.00)	16820506(50.00)	24758475(73.59)	8883240(26.41)
CK_EG_32_rep2	39168712	37526668(95.81)	1097209(2.92)	36429459(97.08)	1642044(4.19)	18229588(50.04)	18199871(49.96)	18215045(50.00)	18214414(50.00)	26889736(73.81)	9539723(26.19)
CK_EG_32_rep3	45452348	43685436(96.11)	1172418(2.68)	42513018(97.32)	1766912(3.89)	21273443(50.04)	21239575(49.96)	21257110(50.00)	21255908(50.00)	31462921(74.01)	11050097(25.99)
CK_EG_40_rep1	33160548	31338613(94.51)	494066(1.58)	30844547(98.42)	1821935(5.49)	15433778(50.04)	15410769(49.96)	15422268(50.00)	15422279(50.00)	22572755(73.18)	8271792(26.82)
CK_EG_40_rep2	34228562	32281502(94.31)	523791(1.62)	31757711(98.38)	1947060(5.69)	15893080(50.04)	15864631(49.96)	15878874(50.00)	15878837(50.00)	23136607(72.85)	8621104(27.15)
CK_EG_40_rep3	38077352	36347576(95.46)	538484(1.48)	35809092(98.52)	1729776(4.54)	17917809(50.04)	17891283(49.96)	17905010(50.00)	17904082(50.00)	26334256(73.54)	9474836(26.46)
CK_EG_44_rep1	43688632	41626288(95.28)	828964(1.99)	40797324(98.01)	2062344(4.72)	20413705(50.04)	20383619(49.96)	20398880(50.00)	20398444(50.00)	30225445(74.09)	10571879(25.91)
CK_EG_44_rep2	47167202	44819314(95.02)	798317(1.78)	44020997(98.22)	2347888(4.98)	22026600(50.04)	21994397(49.96)	22010530(50.00)	22010467(50.00)	32317461(73.41)	11703536(26.59)
CK_EG_44_rep3	44509240	41190910(92.54)	763605(1.85)	40427305(98.15)	3318330(7.46)	20228320(50.04)	20198985(49.96)	20213754(50.00)	20213551(50.00)	29625559(73.28)	10801746(26.72)
CK_EG_48_rep1	32357044	30266565(93.54)	742453(2.45)	29524112(97.55)	2090479(6.46)	14770344(50.03)	14753768(49.97)	14762188(50.00)	14761924(50.00)	21768834(73.73)	7755278(26.27)
CK_EG_48_rep2	36465438	34475303(94.54)	663132(1.92)	33812171(98.08)	1990135(5.46)	16918638(50.04)	16893533(49.96)	16906458(50.00)	16905713(50.00)	24730835(73.14)	9081336(26.86)
CK_EG_48_rep3	40318986	38247541(94.86)	1003816(2.62)	37243725(97.38)	2071445(5.14)	18634023(50.03)	18609702(49.97)	18622062(50.00)	18621663(50.00)	27341841(73.41)	9901884(26.59)
CK_EG_4_rep1	39766042	36702428(92.30)	808227(2.20)	35894201(97.80)	3063614(7.70)	17950277(50.01)	17943924(49.99)	17947066(50.00)	17947135(50.00)	25743373(71.72)	10150828(28.28)
CK_EG_4_rep2	48863868	45504770(93.13)	1453230(3.19)	44051540(96.81)	3359098(6.87)	22030163(50.01)	22021377(49.99)	22025761(50.00)	22025779(50.00)	32012366(72.67)	12039174(27.33)
CK_EG_4_rep3	45749828	42371903(92.62)	840855(1.98)	41531048(98.02)	3377925(7.38)	20769348(50.01)	20761700(49.99)	20765603(50.00)	20765445(50.00)	30607814(73.70)	10923234(26.30)
CK_EG_8_rep1	43270482	39301646(90.83)	1179770(3.00)	38121876(97.00)	3968836(9.17)	19065183(50.01)	19056693(49.99)	19060973(50.00)	19060903(50.00)	27332155(71.70)	10789721(28.30)
CK_EG_8_rep2	47775144	44440630(93.02)	1211245(2.73)	43229385(97.27)	3334514(6.98)	21619823(50.01)	21609562(49.99)	21614604(50.00)	21614781(50.00)	31142801(72.04)	12086584(27.96)
CK_EG_8_rep3	50929910	46395256(91.10)	1256016(2.71)	45139240(97.29)	4534654(8.90)	22575119(50.01)	22564121(49.99)	22569616(50.00)	22569624(50.00)	32774617(72.61)	12364623(27.39)
CK_R2G_12_rep1	37462358	35071186(93.62)	737743(2.10)	34333443(97.90)	2391172(6.38)	17175641(50.03)	17157802(49.97)	17166830(50.00)	17166613(50.00)	24397021(71.06)	9936422(28.94)
CK_R2G_12_rep2	44160984	42406119(96.03)	997416(2.35)	41408703(97.65)	1754865(3.97)	20714033(50.02)	20694670(49.98)	20704525(50.00)	20704178(50.00)	29914018(72.24)	11494685(27.76)
CK_R2G_12_rep3	36873760	34850492(94.51)	749354(2.15)	34101138(97.85)	2023268(5.49)	17058648(50.02)	17042490(49.98)	17050974(50.00)	17050164(50.00)	24721375(72.49)	9379763(27.51)
CK_R2G_16_rep1	43491586	41994871(96.56)	683234(1.63)	41311637(98.37)	1496715(3.44)	20662446(50.02)	20649191(49.98)	20656054(50.00)	20655583(50.00)	29995659(72.61)	11315978(27.39)
CK_R2G_16_rep2	52986192	51468556(97.14)	902755(1.75)	50565801(98.25)	1517636(2.86)	25294086(50.02)	25271715(49.98)	25283322(50.00)	25282479(50.00)	36294905(71.78)	14270896(28.22)
CK_R2G_16_rep3	36869094	35345709(95.87)	577504(1.63)	34768205(98.37)	1523385(4.13)	17389549(50.02)	17378656(49.98)	17384156(50.00)	17384049(50.00)	25031853(72.00)	9736352(28.00)
CK_R2G_20_rep1	36540848	34617082(94.74)	949309(2.74)	33667773(97.26)	1923766(5.26)	16846728(50.04)	16821045(49.96)	16834050(50.00)	16833723(50.00)	24554887(72.93)	9112886(27.07)
CK_R2G_20_rep2	35611040	34062704(95.65)	596142(1.75)	33466562(98.25)	1548336(4.35)	16746959(50.04)	16719603(49.96)	16733273(50.00)	16733289(50.00)	24538564(73.32)	8927998(26.68)
CK_R2G_20_rep3	42307510	39452988(93.25)	672421(1.70)	38780567(98.30)	2854522(6.75)	19403764(50.03)	19376803(49.97)	19390304(50.00)	19390263(50.00)	28354601(73.12)	10425966(26.88)
CK_R2G_24_rep1	35977258	34555999(96.05)	854175(2.47)	33701824(97.53)	1421259(3.95)	16863325(50.04)	16838499(49.96)	16850937(50.00)	16850887(50.00)	24965845(74.08)	8735979(25.92)
CK_R2G_24_rep2	36162668	35214417(97.38)	818976(2.33)	34395441(97.67)	948251(2.62)	17210468(50.04)	17184973(49.96)	17198010(50.00)	17197431(50.00)	25412165(73.88)	8983276(26.12)
CK_R2G_24_rep3	46638032	45028544(96.55)	1514714(3.36)	43513830(96.64)	1609488(3.45)	21773739(50.04)	21740091(49.96)	21756983(50.00)	21756847(50.00)	32087821(73.74)	11426009(26.26)
CK_R2G_32_rep1	46653718	43597027(93.45)	1020182(2.34)	42576845(97.66)	3056691(6.55)	21304074(50.04)	21272771(49.96)	21288488(50.00)	21288357(50.00)	30759681(72.25)	11817164(27.75)
CK_R2G_32_rep2	52672746	49514945(94.00)	805605(1.63)	48709340(98.37)	3157801(6.00)	24371854(50.04)	24337486(49.96)	24354841(50.00)	24354499(50.00)	36271674(74.47)	12437666(25.53)
CK_R2G_32_rep3	44010252	41733224(94.83)	666910(1.60)	41066314(98.40)	2277028(5.17)	20548342(50.04)	20517972(49.96)	20533316(50.00)	20532998(50.00)	30138286(73.39)	10928028(26.61)
CK_R2G_40_rep1	39632362	37338688(94.21)	725995(1.94)	36612693(98.06)	2293674(5.79)	18319181(50.04)	18293512(49.96)	18306541(50.00)	18306152(50.00)	26957374(73.63)	9655319(26.37)
CK_R2G_40_rep2	39414288	37769827(95.83)	701595(1.86)	37068232(98.14)	1644461(4.17)	18546880(50.03)	18521352(49.97)	18534491(50.00)	18533741(50.00)	27290206(73.62)	9778026(26.38)
CK_R2G_40_rep3	37253406	35530565(95.38)	628568(1.77)	34901997(98.23)	1722841(4.62)	17462248(50.03)	17439749(49.97)	17451283(50.00)	17450714(50.00)	25788264(73.89)	9113733(26.11)
CK_R2G_44_rep1	41653498	39253557(94.24)	676298(1.72)	38577259(98.28)	2399941(5.76)	19300074(50.03)	19277185(49.97)	19288607(50.00)	19288652(50.00)	27964465(72.49)	10612794(27.51)
CK_R2G_44_rep2	47445120	43452810(91.59)	737874(1.70)	42714936(98.30)	3992310(8.41)	21376292(50.04)	21338644(49.96)	21357449(50.00)	21357487(50.00)	31346883(73.39)	11368053(26.61)
CK_R2G_44_rep3	38949684	36782273(94.44)	830647(2.26)	35951626(97.74)	2167411(5.56)	17986338(50.03)	17965288(49.97)	17975995(50.00)	17975631(50.00)	27302382(75.94)	8649244(24.06)
CK_R2G_48_rep1	39263300	35819126(91.23)	801597(2.24)	35017529(97.76)	3444174(8.77)	17522200(50.04)	17495329(49.96)	17509008(50.00)	17508521(50.00)	25467374(72.73)	9550155(27.27)
CK_R2G_48_rep2	35722624	34056379(95.34)	788967(2.32)	33267412(97.68)	1666245(4.66)	16648930(50.05)	16618482(49.95)	16634153(50.00)	16633259(50.00)	24127645(72.53)	9139767(27.47)
CK_R2G_48_rep3	35907414	34564419(96.26)	730360(2.11)	33834059(97.89)	1342995(3.74)	16929171(50.04)	16904888(49.96)	16917479(50.00)	16916580(50.00)	24848067(73.44)	8985992(26.56)
CK_R2G_4_rep1	44614440	41240650(92.44)	755608(1.83)	40485042(98.17)	3373790(7.56)	20245564(50.01)	20239478(49.99)	20242616(50.00)	20242426(50.00)	29416328(72.66)	11068714(27.34)
CK_R2G_4_rep2	43174434	39865135(92.34)	710454(1.78)	39154681(98.22)	3309299(7.66)	19580668(50.01)	19574013(49.99)	19577350(50.00)	19577331(50.00)	27868561(71.18)	11286120(28.82)
CK_R2G_4_rep3	37788580	35090007(92.86)	801845(2.29)	34288162(97.71)	2698573(7.14)	17146908(50.01)	17141254(49.99)	17144030(50.00)	17144132(50.00)	24945266(72.75)	9342896(27.25)
CK_R2G_8_rep1	40298318	36864277(91.48)	1096409(2.97)	35767868(97.03)	3434041(8.52)	17887336(50.01)	17880532(49.99)	17883899(50.00)	17883969(50.00)	25746866(71.98)	10021002(28.02)
CK_R2G_8_rep2	41513154	38388789(92.47)	953683(2.48)	37435106(97.52)	3124365(7.53)	18723163(50.01)	18711943(49.99)	18717548(50.00)	18717558(50.00)	27127571(72.47)	10307535(27.53)
CK_R2G_8_rep3	38543230	34895422(90.54)	893621(2.56)	34001801(97.44)	3647808(9.46)	17004793(50.01)	16997008(49.99)	17000887(50.00)	17000914(50.00)	24357631(71.64)	9644170(28.36)
EG_0_rep1	49681678	46956158(94.51)	1138853(2.43)	45817305(97.57)	2725520(5.49)	22921055(50.03)	22896250(49.97)	22909042(50.00)	22908263(50.00)	33900541(73.99)	11916764(26.01)
EG_0_rep2	43078220	40773060(94.65)	746406(1.83)	40026654(98.17)	2305160(5.35)	20026860(50.03)	19999794(49.97)	20013667(50.00)	20012987(50.00)	29599184(73.95)	10427470(26.05)
EG_0_rep3	37336446	35504603(95.09)	850735(2.40)	34653868(97.60)	1831843(4.91)	17336353(50.03)	17317515(49.97)	17326944(50.00)	17326924(50.00)	25053675(72.30)	9600193(27.70)
EG_10_rep1	52681660	50356127(95.59)	1195851(2.37)	49160276(97.63)	2325533(4.41)	24591097(50.02)	24569179(49.98)	24581379(50.00)	24578897(49.99)	37116757(75.50)	12043519(24.50)
EG_10_rep2	40683396	38647636(95.00)	997777(2.58)	37649859(97.42)	2035760(5.00)	18834574(50.03)	18815285(49.97)	18825985(50.00)	18823874(49.99)	28184183(74.86)	9465676(25.14)
EG_10_rep3	42551088	40786685(95.85)	893605(2.19)	39893080(97.81)	1764403(4.15)	19957259(50.03)	19935821(49.97)	19947692(50.00)	19945388(49.99)	29665994(74.36)	10227086(25.64)
EG_12_rep1	41391934	39036389(94.31)	912072(2.34)	38124317(97.66)	2355545(5.69)	19073208(50.03)	19051109(49.97)	19063095(50.00)	19061222(50.00)	28017700(73.49)	10106617(26.51)
EG_12_rep2	46829152	44548638(95.13)	1006532(2.26)	43542106(97.74)	2280514(4.87)	21782828(50.03)	21759278(49.97)	21771783(50.00)	21770323(50.00)	32035638(73.57)	11506468(26.43)
EG_12_rep3	39532174	38042058(96.23)	860592(2.26)	37181466(97.74)	1490116(3.77)	18600842(50.03)	18580624(49.97)	18591774(50.00)	18589692(49.99)	27233820(73.25)	9947646(26.75)
EG_14_rep1	38863360	37632244(96.83)	668418(1.78)	36963826(98.22)	1231116(3.17)	18489512(50.02)	18474314(49.98)	18482603(50.00)	18481223(50.00)	27627663(74.74)	9336163(25.26)
EG_14_rep2	41632424	39114400(93.95)	1602974(4.10)	37511426(95.90)	2518024(6.05)	18763747(50.02)	18747679(49.98)	18756753(50.00)	18754673(49.99)	28462539(75.88)	9048887(24.12)
EG_14_rep3	40119536	38180838(95.17)	1354286(3.55)	36826552(96.45)	1938698(4.83)	18421649(50.02)	18404903(49.98)	18414620(50.00)	18411932(49.99)	28343167(76.96)	8483385(23.04)
EG_16_rep1	39533442	37936211(95.96)	908226(2.39)	37027985(97.61)	1597231(4.04)	18518741(50.01)	18509244(49.99)	18514353(50.00)	18513632(50.00)	27780780(75.03)	9247205(24.97)
EG_16_rep2	40278626	38172668(94.77)	1077150(2.82)	37095518(97.18)	2105958(5.23)	18557945(50.03)	18537573(49.97)	18548604(50.00)	18546914(50.00)	28066705(75.66)	9028813(24.34)
EG_16_rep3	36004188	34599761(96.10)	794325(2.30)	33805436(97.70)	1404427(3.90)	16911181(50.03)	16894255(49.97)	16903589(50.00)	16901847(49.99)	25676061(75.95)	8129375(24.05)
EG_18_rep1	33006074	31817882(96.40)	717761(2.26)	31100121(97.74)	1188192(3.60)	15561606(50.04)	15538515(49.96)	15549988(50.00)	15550133(50.00)	22951974(73.80)	8148147(26.20)
EG_18_rep2	33754058	32475324(96.21)	757804(2.33)	31717520(97.67)	1278734(3.79)	15869522(50.03)	15847998(49.97)	15858625(50.00)	15858895(50.00)	23549634(74.25)	8167886(25.75)
EG_18_rep3	35345932	33644293(95.19)	998922(2.97)	32645371(97.03)	1701639(4.81)	16336918(50.04)	16308453(49.96)	16322719(50.00)	16322652(50.00)	24388596(74.71)	8256775(25.29)
EG_20_rep1	52788738	50785892(96.21)	1370657(2.70)	49415235(97.30)	2002846(3.79)	24725219(50.04)	24690016(49.96)	24708088(50.00)	24707147(50.00)	37396676(75.68)	12018559(24.32)
EG_20_rep2	34254534	32608809(95.20)	750455(2.30)	31858354(97.70)	1645725(4.80)	15942156(50.04)	15916198(49.96)	15929415(50.00)	15928939(50.00)	23836042(74.82)	8022312(25.18)
EG_20_rep3	33014992	31535456(95.52)	886695(2.81)	30648761(97.19)	1479536(4.48)	15335938(50.04)	15312823(49.96)	15324581(50.00)	15324180(50.00)	23082237(75.31)	7566524(24.69)
EG_22_rep1	39582110	37561863(94.90)	672410(1.79)	36889453(98.21)	2020247(5.10)	18459125(50.04)	18430328(49.96)	18444842(50.00)	18444611(50.00)	27458746(74.44)	9430707(25.56)
EG_22_rep2	42633192	40627948(95.30)	856488(2.11)	39771460(97.89)	2005244(4.70)	19901708(50.04)	19869752(49.96)	19886034(50.00)	19885426(50.00)	30413506(76.47)	9357954(23.53)
EG_22_rep3	35897770	34170365(95.19)	762289(2.23)	33408076(97.77)	1727405(4.81)	16715434(50.03)	16692642(49.97)	16703985(50.00)	16704091(50.00)	25451138(76.18)	7956938(23.82)
EG_24_rep1	32609312	30649643(93.99)	789890(2.58)	29859753(97.42)	1959669(6.01)	14940058(50.03)	14919695(49.97)	14930227(50.00)	14929526(50.00)	22675466(75.94)	7184287(24.06)
EG_24_rep2	36864100	35128565(95.29)	896523(2.55)	34232042(97.45)	1735535(4.71)	17128594(50.04)	17103448(49.96)	17116733(50.00)	17115309(50.00)	26022614(76.02)	8209428(23.98)
EG_24_rep3	35849222	33896798(94.55)	811078(2.39)	33085720(97.61)	1952424(5.45)	16556012(50.04)	16529708(49.96)	16543371(50.00)	16542349(50.00)	24889409(75.23)	8196311(24.77)
EG_28_rep1	42235238	40835176(96.69)	743200(1.82)	40091976(98.18)	1400062(3.31)	20058980(50.03)	20032996(49.97)	20046669(50.00)	20045307(50.00)	29917237(74.62)	10174739(25.38)
EG_28_rep2	31872218	28330981(88.89)	506805(1.79)	27824176(98.21)	3541237(11.11)	13921702(50.03)	13902474(49.97)	13912551(50.00)	13911625(50.00)	21099181(75.83)	6724995(24.17)
EG_28_rep3	36859128	34566583(93.78)	606304(1.75)	33960279(98.25)	2292545(6.22)	16992566(50.04)	16967713(49.96)	16980712(50.00)	16979567(50.00)	25426028(74.87)	8534251(25.13)
EG_2_rep1	36222640	33212857(91.69)	631281(1.90)	32581576(98.10)	3009783(8.31)	16292869(50.01)	16288707(49.99)	16290826(50.00)	16290750(50.00)	23024182(70.67)	9557394(29.33)
EG_2_rep2	38362100	35248473(91.88)	621549(1.76)	34626924(98.24)	3113627(8.12)	17315986(50.01)	17310938(49.99)	17313498(50.00)	17313426(50.00)	24513468(70.79)	10113456(29.21)
EG_2_rep3	43872056	39675539(90.43)	732452(1.85)	38943087(98.15)	4196517(9.57)	19474297(50.01)	19468790(49.99)	19471597(50.00)	19471490(50.00)	28110669(72.18)	10832418(27.82)
EG_32_rep1	33422548	31493713(94.23)	449403(1.43)	31044310(98.57)	1928835(5.77)	15525259(50.01)	15519051(49.99)	15521971(50.00)	15522339(50.00)	24134273(77.74)	6910037(22.26)
EG_32_rep2	34994458	33664234(96.20)	474864(1.41)	33189370(98.59)	1330224(3.80)	16597799(50.01)	16591571(49.99)	16594529(50.00)	16594841(50.00)	24905104(75.04)	8284266(24.96)
EG_32_rep3	31636206	30061535(95.02)	472126(1.57)	29589409(98.43)	1574671(4.98)	14797453(50.01)	14791956(49.99)	14794603(50.00)	14794806(50.00)	22891650(77.36)	6697759(22.64)
EG_36_rep1	35091266	33396670(95.17)	546643(1.64)	32850027(98.36)	1694596(4.83)	16427934(50.01)	16422093(49.99)	16424986(50.00)	16425041(50.00)	25074259(76.33)	7775768(23.67)
EG_36_rep2	31992650	30610787(95.68)	480893(1.57)	30129894(98.43)	1381863(4.32)	15067338(50.01)	15062556(49.99)	15064870(50.00)	15065024(50.00)	23971120(79.56)	6158774(20.44)
EG_36_rep3	31617424	30312111(95.87)	574510(1.90)	29737601(98.10)	1305313(4.13)	14871469(50.01)	14866132(49.99)	14868621(50.00)	14868980(50.00)	23394288(78.67)	6343313(21.33)
EG_38_rep1	47480178	45585187(96.01)	809997(1.78)	44775190(98.22)	1894991(3.99)	22404489(50.04)	22370701(49.96)	22387649(50.00)	22387541(50.00)	32949036(73.59)	11826154(26.41)
EG_38_rep2	37870252	35372516(93.40)	627256(1.77)	34745260(98.23)	2497736(6.60)	17386063(50.04)	17359197(49.96)	17372885(50.00)	17372375(50.00)	26359823(75.87)	8385437(24.13)
EG_38_rep3	40738752	39098901(95.97)	668885(1.71)	38430016(98.29)	1639851(4.03)	19229680(50.04)	19200336(49.96)	19215156(50.00)	19214860(50.00)	28622570(74.48)	9807446(25.52)
EG_40_rep1	36698264	35237828(96.02)	540526(1.53)	34697302(98.47)	1460436(3.98)	17364590(50.05)	17332712(49.95)	17349004(50.00)	17348298(50.00)	25240312(72.74)	9456990(27.26)
EG_40_rep2	44948352	43010579(95.69)	793589(1.85)	42216990(98.15)	1937773(4.31)	21127295(50.04)	21089695(49.96)	21109206(50.00)	21107784(50.00)	31603823(74.86)	10613167(25.14)
EG_40_rep3	40571102	39113490(96.41)	647481(1.66)	38466009(98.34)	1457612(3.59)	19250244(50.04)	19215765(49.96)	19233536(50.00)	19232473(50.00)	28139027(73.15)	10326982(26.85)
EG_42_rep1	35409776	33174740(93.69)	485976(1.46)	32688764(98.54)	2235036(6.31)	16358800(50.04)	16329964(49.96)	16344482(50.00)	16344282(50.00)	24396773(74.63)	8291991(25.37)
EG_42_rep2	40418624	38999590(96.49)	583473(1.50)	38416117(98.50)	1419034(3.51)	19223937(50.04)	19192180(49.96)	19208157(50.00)	19207960(50.00)	27999327(72.88)	10416790(27.12)
EG_42_rep3	32606398	30873786(94.69)	430982(1.40)	30442804(98.60)	1732612(5.31)	15234126(50.04)	15208678(49.96)	15221869(50.00)	15220935(50.00)	22595822(74.22)	7846982(25.78)
EG_44_rep1	40673936	39260487(96.52)	759557(1.93)	38500930(98.07)	1413449(3.48)	19259769(50.02)	19241161(49.98)	19250571(50.00)	19250359(50.00)	27828479(72.28)	10672451(27.72)
EG_44_rep2	45845128	42253880(92.17)	633818(1.50)	41620062(98.50)	3591248(7.83)	20827625(50.04)	20792437(49.96)	20810517(50.00)	20809545(50.00)	30564299(73.44)	11055763(26.56)
EG_44_rep3	33990186	32728486(96.29)	476291(1.46)	32252195(98.54)	1261700(3.71)	16139883(50.04)	16112312(49.96)	16126462(50.00)	16125733(50.00)	23187871(71.90)	9064324(28.10)
EG_46_rep1	36440904	35187875(96.56)	632135(1.80)	34555740(98.20)	1253029(3.44)	17290924(50.04)	17264816(49.96)	17278216(50.00)	17277524(50.00)	24904406(72.07)	9651334(27.93)
EG_46_rep2	39543450	37333018(94.41)	648198(1.74)	36684820(98.26)	2210432(5.59)	18357248(50.04)	18327572(49.96)	18342765(50.00)	18342055(50.00)	26590121(72.48)	10094699(27.52)
EG_46_rep3	34507206	33185662(96.17)	530184(1.60)	32655478(98.40)	1321544(3.83)	16339976(50.04)	16315502(49.96)	16328020(50.00)	16327458(50.00)	23181866(70.99)	9473612(29.01)
EG_48W_rep1	36684138	35313818(96.26)	869509(2.46)	34444309(97.54)	1370320(3.74)	17236345(50.04)	17207964(49.96)	17222288(50.00)	17222021(50.00)	24448734(70.98)	9995575(29.02)
EG_48W_rep2	38684342	35147909(90.86)	579957(1.65)	34567952(98.35)	3536433(9.14)	17296215(50.04)	17271737(49.96)	17284438(50.00)	17283514(50.00)	25470232(73.68)	9097720(26.32)
EG_48W_rep3	38726922	36704004(94.78)	601201(1.64)	36102803(98.36)	2022918(5.22)	18065506(50.04)	18037297(49.96)	18051947(50.00)	18050856(50.00)	26525398(73.47)	9577405(26.53)
EG_48_rep1	48225100	46127145(95.65)	787899(1.71)	45339246(98.29)	2097955(4.35)	22685994(50.04)	22653252(49.96)	22670243(50.00)	22669003(50.00)	32537519(71.76)	12801727(28.24)
EG_48_rep2	38124822	36813940(96.56)	719773(1.96)	36094167(98.04)	1310882(3.44)	18061622(50.04)	18032545(49.96)	18047470(50.00)	18046697(50.00)	25791875(71.46)	10302292(28.54)
EG_48_rep3	37422802	36116823(96.51)	835382(2.31)	35281441(97.69)	1305979(3.49)	17655302(50.04)	17626139(49.96)	17641256(50.00)	17640185(50.00)	25125657(71.21)	10155784(28.79)
EG_4_rep1	50483362	45596207(90.32)	1182690(2.59)	44413517(97.41)	4887155(9.68)	22211265(50.01)	22202252(49.99)	22206836(50.00)	22206681(50.00)	31744225(71.47)	12669292(28.53)
EG_4_rep2	38570304	35927870(93.15)	760253(2.12)	35167617(97.88)	2642434(6.85)	17586723(50.01)	17580894(49.99)	17583898(50.00)	17583719(50.00)	25736253(73.18)	9431364(26.82)
EG_4_rep3	47467862	42824697(90.22)	890703(2.08)	41933994(97.92)	4643165(9.78)	20971074(50.01)	20962920(49.99)	20967000(50.00)	20966994(50.00)	30582369(72.93)	11351625(27.07)
EG_6_rep1	43721400	39593298(90.56)	981146(2.48)	38612152(97.52)	4128102(9.44)	19310424(50.01)	19301728(49.99)	19306120(50.00)	19306032(50.00)	27995456(72.50)	10616696(27.50)
EG_6_rep2	53042632	47737459(90.00)	1276724(2.67)	46460735(97.33)	5305173(10.00)	23236353(50.01)	23224382(49.99)	23230339(50.00)	23230396(50.00)	33789825(72.73)	12670910(27.27)
EG_6_rep3	49909396	44988071(90.14)	1191863(2.65)	43796208(97.35)	4921325(9.86)	21902994(50.01)	21893214(49.99)	21898131(50.00)	21898077(50.00)	31998593(73.06)	11797615(26.94)
EG_8_rep1	43320134	39106951(90.27)	902507(2.31)	38204444(97.69)	4213183(9.73)	19105647(50.01)	19098797(49.99)	19102182(50.00)	19102262(50.00)	27877652(72.97)	10326792(27.03)
EG_8_rep2	42287008	37780492(89.34)	802014(2.12)	36978478(97.88)	4506516(10.66)	18493179(50.01)	18485299(49.99)	18489227(50.00)	18489251(50.00)	27064121(73.19)	9914357(26.81)
EG_8_rep3	42981836	38661295(89.95)	821247(2.12)	37840048(97.88)	4320541(10.05)	18924747(50.01)	18915301(49.99)	18920066(50.00)	18919982(50.00)	27621889(73.00)	10218159(27.00)
R2G_0_rep1	34749712	32814202(94.43)	570148(1.74)	32244054(98.26)	1935510(5.57)	16130549(50.03)	16113505(49.97)	16122430(50.00)	16121624(50.00)	23940689(74.25)	8303365(25.75)
R2G_0_rep2	35572248	33252737(93.48)	579522(1.74)	32673215(98.26)	2319511(6.52)	16346446(50.03)	16326769(49.97)	16336757(50.00)	16336458(50.00)	24265520(74.27)	8407695(25.73)
R2G_0_rep3	37302450	34127146(91.49)	589286(1.73)	33537860(98.27)	3175304(8.51)	16777974(50.03)	16759886(49.97)	16769189(50.00)	16768671(50.00)	24936447(74.35)	8601413(25.65)
R2G_10_rep1	42387466	39358572(92.85)	922623(2.34)	38435949(97.66)	3028894(7.15)	19222057(50.01)	19213892(49.99)	19218005(50.00)	19217944(50.00)	28314796(73.67)	10121153(26.33)
R2G_10_rep2	37167028	33876570(91.15)	936619(2.76)	32939951(97.24)	3290458(8.85)	16473757(50.01)	16466194(49.99)	16469978(50.00)	16469973(50.00)	24269154(73.68)	8670797(26.32)
R2G_10_rep3	43523650	40447923(92.93)	1166048(2.88)	39281875(97.12)	3075727(7.07)	19645249(50.01)	19636626(49.99)	19640922(50.00)	19640953(50.00)	29028442(73.90)	10253433(26.10)
R2G_12_rep1	40994274	39833506(97.17)	1158099(2.91)	38675407(97.09)	1160768(2.83)	19342546(50.01)	19332861(49.99)	19337979(50.00)	19337428(50.00)	28445359(73.55)	10230048(26.45)
R2G_12_rep2	53586470	51958555(96.96)	1344552(2.59)	50614003(97.41)	1627915(3.04)	25319434(50.02)	25294569(49.98)	25307902(50.00)	25306101(50.00)	37054272(73.21)	13559731(26.79)
R2G_12_rep3	44249210	42608304(96.29)	941077(2.21)	41667227(97.79)	1640906(3.71)	20844330(50.03)	20822897(49.97)	20834304(50.00)	20832923(50.00)	30665820(73.60)	11001407(26.40)
R2G_14_rep1	43905612	41940045(95.52)	1059780(2.53)	40880265(97.47)	1965567(4.48)	20450770(50.03)	20429495(49.97)	20441152(50.00)	20439113(50.00)	31098128(76.07)	9782137(23.93)
R2G_14_rep2	46010530	43715827(95.01)	1158048(2.65)	42557779(97.35)	2294703(4.99)	21291912(50.03)	21265867(49.97)	21279910(50.00)	21277869(50.00)	32015204(75.23)	10542575(24.77)
R2G_14_rep3	35448936	33213702(93.69)	1064805(3.21)	32148897(96.79)	2235234(6.31)	16082908(50.03)	16065989(49.97)	16075135(50.00)	16073762(50.00)	24209182(75.30)	7939715(24.70)
R2G_16_rep1	47479284	45427376(95.68)	1134742(2.50)	44292634(97.50)	2051908(4.32)	22156270(50.02)	22136364(49.98)	22146982(50.00)	22145652(50.00)	33347347(75.29)	10945287(24.71)
R2G_16_rep2	36784342	35417644(96.28)	658153(1.86)	34759491(98.14)	1366698(3.72)	17388424(50.02)	17371067(49.98)	17380502(50.00)	17378989(50.00)	26139345(75.20)	8620146(24.80)
R2G_16_rep3	37873608	35075570(92.61)	652546(1.86)	34423024(98.14)	2798038(7.39)	17219781(50.02)	17203243(49.98)	17212373(50.00)	17210651(49.99)	25904557(75.25)	8518467(24.75)
R2G_18_rep1	37542148	36190449(96.40)	921360(2.55)	35269089(97.45)	1351699(3.60)	17643275(50.02)	17625814(49.98)	17635216(50.00)	17633873(50.00)	26312586(74.61)	8956503(25.39)
R2G_18_rep2	38067686	36945351(97.05)	862790(2.34)	36082561(97.66)	1122335(2.95)	18050318(50.03)	18032243(49.97)	18042196(50.00)	18040365(49.99)	27241172(75.50)	8841389(24.50)
R2G_18_rep3	41384958	40045921(96.76)	1308061(3.27)	38737860(96.73)	1339037(3.24)	19377971(50.02)	19359889(49.98)	19370322(50.00)	19367538(49.99)	29732475(76.75)	9005385(23.25)
R2G_20_rep1	43937682	42449898(96.61)	888493(2.09)	41561405(97.91)	1487784(3.39)	20788655(50.02)	20772750(49.98)	20781935(50.00)	20779470(49.99)	31405981(75.57)	10155424(24.43)
R2G_20_rep2	48726370	46854841(96.16)	935011(2.00)	45919830(98.00)	1871529(3.84)	22971406(50.03)	22948424(49.97)	22961172(50.00)	22958658(49.99)	35085659(76.41)	10834171(23.59)
R2G_20_rep3	47960594	45917361(95.74)	823665(1.79)	45093696(98.21)	2043233(4.26)	22557687(50.02)	22536009(49.98)	22548154(50.00)	22545542(49.99)	34186711(75.81)	10906985(24.19)
R2G_22_rep1	33829142	32284872(95.44)	1664513(5.16)	30620359(94.84)	1544270(4.56)	15316273(50.02)	15304086(49.98)	15310019(50.00)	15310340(50.00)	23166194(75.66)	7454165(24.34)
R2G_22_rep2	40599576	39153661(96.44)	937065(2.39)	38216596(97.61)	1445915(3.56)	19124409(50.04)	19092187(49.96)	19108337(50.00)	19108259(50.00)	28721844(75.16)	9494752(24.84)
R2G_22_rep3	40945248	39077863(95.44)	895818(2.29)	38182045(97.71)	1867385(4.56)	19109066(50.05)	19072979(49.95)	19090915(50.00)	19091130(50.00)	28571346(74.83)	9610699(25.17)
R2G_24_rep1	40435438	38149063(94.35)	1145415(3.00)	37003648(97.00)	2286375(5.65)	18518892(50.05)	18484756(49.95)	18502441(50.00)	18501207(50.00)	28058741(75.83)	8944907(24.17)
R2G_24_rep2	36199504	34604977(95.60)	958874(2.77)	33646103(97.23)	1594527(4.40)	16837817(50.04)	16808286(49.96)	16823458(50.00)	16822645(50.00)	25264804(75.09)	8381299(24.91)
R2G_24_rep3	34762458	32912527(94.68)	1865169(5.67)	31047358(94.33)	1849931(5.32)	15536567(50.04)	15510791(49.96)	15524089(50.00)	15523269(50.00)	23877648(76.91)	7169710(23.09)
R2G_28_rep1	36098290	34721006(96.18)	570388(1.64)	34150618(98.36)	1377284(3.82)	17083061(50.02)	17067557(49.98)	17075765(50.00)	17074853(50.00)	25540512(74.79)	8610106(25.21)
R2G_28_rep2	47781856	45731575(95.71)	911932(1.99)	44819643(98.01)	2050281(4.29)	22425065(50.03)	22394578(49.97)	22411151(50.00)	22408492(49.99)	34172890(76.25)	10646753(23.75)
R2G_28_rep3	36395240	34792340(95.60)	565442(1.63)	34226898(98.37)	1602900(4.40)	17120851(50.02)	17106047(49.98)	17113832(50.00)	17113066(50.00)	25820581(75.44)	8406317(24.56)
R2G_2_rep1	36432524	34436900(94.52)	582695(1.69)	33854205(98.31)	1995624(5.48)	16935290(50.02)	16918915(49.98)	16927922(50.00)	16926283(50.00)	24373891(72.00)	9480314(28.00)
R2G_2_rep2	44830288	42754613(95.37)	777667(1.82)	41976946(98.18)	2075675(4.63)	20999259(50.03)	20977687(49.97)	20989209(50.00)	20987737(50.00)	30055301(71.60)	11921645(28.40)
R2G_2_rep3	36581040	34609596(94.61)	663767(1.92)	33945829(98.08)	1971444(5.39)	16982536(50.03)	16963293(49.97)	16973779(50.00)	16972050(49.99)	24627936(72.55)	9317893(27.45)
R2G_32_rep1	34547294	32107828(92.94)	548797(1.71)	31559031(98.29)	2439466(7.06)	15783931(50.01)	15775100(49.99)	15779643(50.00)	15779388(50.00)	22919056(72.62)	8639975(27.38)
R2G_32_rep2	46714564	45286138(96.94)	1001003(2.21)	44285135(97.79)	1428426(3.06)	22160655(50.04)	22124480(49.96)	22142894(50.00)	22142241(50.00)	33387213(75.39)	10897922(24.61)
R2G_32_rep3	36353488	34924585(96.07)	773583(2.22)	34151002(97.78)	1428903(3.93)	17091381(50.05)	17059621(49.95)	17075970(50.00)	17075032(50.00)	25851130(75.70)	8299872(24.30)
R2G_36_rep1	34147846	32728957(95.84)	528001(1.61)	32200956(98.39)	1418889(4.16)	16103419(50.01)	16097537(49.99)	16100418(50.00)	16100538(50.00)	24728514(76.79)	7472442(23.21)
R2G_36_rep2	32219202	30684241(95.24)	468327(1.53)	30215914(98.47)	1534961(4.76)	15110925(50.01)	15104989(49.99)	15107950(50.00)	15107964(50.00)	23235122(76.90)	6980792(23.10)
R2G_36_rep3	38813272	36986913(95.29)	631134(1.71)	36355779(98.29)	1826359(4.71)	18181112(50.01)	18174667(49.99)	18177748(50.00)	18178031(50.00)	28073756(77.22)	8282023(22.78)
R2G_38_rep1	38576494	34978103(90.67)	707308(2.02)	34270795(97.98)	3598391(9.33)	17144561(50.03)	17126234(49.97)	17135362(50.00)	17135433(50.00)	25601510(74.70)	8669285(25.30)
R2G_38_rep2	56864570	54016513(94.99)	997727(1.85)	53018786(98.15)	2848057(5.01)	26530503(50.04)	26488283(49.96)	26510024(50.00)	26508762(50.00)	39120230(73.79)	13898556(26.21)
R2G_38_rep3	45562138	42973502(94.32)	767498(1.79)	42206004(98.21)	2588636(5.68)	21114226(50.03)	21091778(49.97)	21103261(50.00)	21102743(50.00)	31523204(74.69)	10682800(25.31)
R2G_40_rep1	40906916	38971881(95.27)	672175(1.72)	38299706(98.28)	1935035(4.73)	19157904(50.02)	19141802(49.98)	19149895(50.00)	19149811(50.00)	28305766(73.91)	9993940(26.09)
R2G_40_rep2	41199896	39279527(95.34)	655763(1.67)	38623764(98.33)	1920369(4.66)	19325863(50.04)	19297901(49.96)	19312103(50.00)	19311661(50.00)	28224989(73.08)	10398775(26.92)
R2G_40_rep3	34248282	32499144(94.89)	538914(1.66)	31960230(98.34)	1749138(5.11)	15992294(50.04)	15967936(49.96)	15980491(50.00)	15979739(50.00)	23201220(72.59)	8759010(27.41)
R2G_42_rep1	49420914	46997195(95.10)	690855(1.47)	46306340(98.53)	2423719(4.90)	23172401(50.04)	23133939(49.96)	23153354(50.00)	23152986(50.00)	33397764(72.12)	12908576(27.88)
R2G_42_rep2	36421286	34981678(96.05)	527206(1.51)	34454472(98.49)	1439608(3.95)	17245351(50.05)	17209121(49.95)	17227112(50.00)	17227360(50.00)	24745104(71.82)	9709368(28.18)
R2G_42_rep3	38390348	36603935(95.35)	530817(1.45)	36073118(98.55)	1786413(4.65)	18052626(50.04)	18020492(49.96)	18036951(50.00)	18036167(50.00)	26125355(72.42)	9947763(27.58)
R2G_44_rep1	40771020	38720992(94.97)	688061(1.78)	38032931(98.22)	2050028(5.03)	19029250(50.03)	19003681(49.97)	19017036(50.00)	19015895(50.00)	28197230(74.14)	9835701(25.86)
R2G_44_rep2	35357708	33937462(95.98)	587505(1.73)	33349957(98.27)	1420246(4.02)	16687503(50.04)	16662454(49.96)	16675378(50.00)	16674579(50.00)	24290220(72.83)	9059737(27.17)
R2G_44_rep3	34033314	32727597(96.16)	558452(1.71)	32169145(98.29)	1305717(3.84)	16097613(50.04)	16071532(49.96)	16084768(50.00)	16084377(50.00)	23315086(72.48)	8854059(27.52)
R2G_46_rep1	35445044	33930093(95.73)	489136(1.44)	33440957(98.56)	1514951(4.27)	16732741(50.04)	16708216(49.96)	16720555(50.00)	16720402(50.00)	23879319(71.41)	9561638(28.59)
R2G_46_rep2	33917940	32296246(95.22)	464773(1.44)	31831473(98.56)	1621694(4.78)	15928149(50.04)	15903324(49.96)	15915867(50.00)	15915606(50.00)	22941759(72.07)	8889714(27.93)
R2G_46_rep3	35907284	33920051(94.47)	482124(1.42)	33437927(98.58)	1987233(5.53)	16731483(50.04)	16706444(49.96)	16719310(50.00)	16718617(50.00)	23904908(71.49)	9533019(28.51)
R2G_48_rep1	38478522	37114596(96.46)	712027(1.92)	36402569(98.08)	1363926(3.54)	18215476(50.04)	18187093(49.96)	18201618(50.00)	18200951(50.00)	25901074(71.15)	10501495(28.85)
R2G_48_rep2	41720622	39762997(95.31)	764082(1.92)	38998915(98.08)	1957625(4.69)	19514480(50.04)	19484435(49.96)	19500049(50.00)	19498866(50.00)	28126985(72.12)	10871930(27.88)
R2G_48_rep3	36154990	34794029(96.24)	695634(2.00)	34098395(98.00)	1360961(3.76)	17062047(50.04)	17036348(49.96)	17049762(50.00)	17048633(50.00)	24745326(72.57)	9353069(27.43)
R2G_4_rep1	40527778	37339198(92.13)	885669(2.37)	36453529(97.63)	3188580(7.87)	18230714(50.01)	18222815(49.99)	18226835(50.00)	18226694(50.00)	26209111(71.90)	10244418(28.10)
R2G_4_rep2	38399450	35472689(92.38)	843912(2.38)	34628777(97.62)	2926761(7.62)	17316744(50.01)	17312033(49.99)	17314372(50.00)	17314405(50.00)	25001264(72.20)	9627513(27.80)
R2G_4_rep3	40182784	37360262(92.98)	835557(2.24)	36524705(97.76)	2822522(7.02)	18264332(50.01)	18260373(49.99)	18262353(50.00)	18262352(50.00)	26363048(72.18)	10161657(27.82)
R2G_6_rep1	44047942	40337983(91.58)	972953(2.41)	39365030(97.59)	3709959(8.42)	19686884(50.01)	19678146(49.99)	19682536(50.00)	19682494(50.00)	28324743(71.95)	11040287(28.05)
R2G_6_rep2	52950294	48316336(91.25)	1375612(2.85)	46940724(97.15)	4633958(8.75)	23473697(50.01)	23467027(49.99)	23470373(50.00)	23470351(50.00)	34240270(72.94)	12700454(27.06)
R2G_6_rep3	37748140	34770727(92.11)	843931(2.43)	33926796(97.57)	2977413(7.89)	16966580(50.01)	16960216(49.99)	16963475(50.00)	16963321(50.00)	24800078(73.10)	9126718(26.90)
R2G_8_rep1	38553048	35482794(92.04)	1138908(3.21)	34343886(96.79)	3070254(7.96)	17175798(50.01)	17168088(49.99)	17172044(50.00)	17171842(50.00)	25662112(74.72)	8681774(25.28)
R2G_8_rep2	38450288	35552242(92.46)	716614(2.02)	34835628(97.98)	2898046(7.54)	17421617(50.01)	17414011(49.99)	17417888(50.00)	17417740(50.00)	25718895(73.83)	9116733(26.17)
R2G_8_rep3	42567894	38984215(91.58)	791204(2.03)	38193011(97.97)	3583679(8.42)	19101637(50.01)	19091374(49.99)	19096508(50.00)	19096503(50.00)	27770028(72.71)	10422983(27.29)
